# Supplementary material for: Ultrasound Patterns in the First Trimester Diagnosis of Congenital Heart Disease
Source: MDPI journal article supplement (doi:10.3390/jcm10153206), 2021-07-21
Supplement: s1 [file s1]

**Table S1–Colour Flow Patterns seen on the 4-chamber and 3-vessel and trachea views  
in normal and abnormal cases.**

| <div>4-chamber view</div> <div>3-vessel and trachea view</div>                                                                                                                         | <b>Pattern 1</b> - nonturbulent filling of both ventricles normal cardiac axis              | <b>Pattern 2</b> - nonturbulent filling of both ventricles cardiac axis shifted to the left | <b>Pattern 3</b> - common inflow for both ventricles                                         | <b>Pattern 4</b> - one of the ventricles, the left one, appears shorter                       | <b>Pattern 5</b> - filling of only one ventricle                                              |
|----------------------------------------------------------------------------------------------------------------------------------------------------------------------------------------|---------------------------------------------------------------------------------------------|---------------------------------------------------------------------------------------------|----------------------------------------------------------------------------------------------|-----------------------------------------------------------------------------------------------|-----------------------------------------------------------------------------------------------|
|                                                                                                                                                                                        | 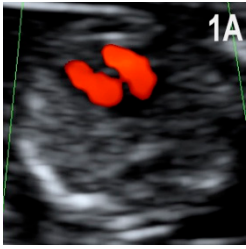 <b>1A</b> |  <b>1B</b> |  <b>1C</b> |  <b>1D</b> |  <b>1E</b> |
| <b>Pattern 1</b> - the ductus arteriosus and the aorta form the typical V sign<br> <b>2A</b>           | <b>Normal heart</b>                                                                         |                                                                                             | <b>AVSD</b>                                                                                  |                                                                                               |                                                                                               |
| <b>Pattern 2</b> - the ductus arteriosus and the aorta form a U sign around the trachea<br> <b>2B</b> | <b>RAA</b>                                                                                  |                                                                                             |                                                                                              |                                                                                               |                                                                                               |
| <b>Pattern 3</b> - both arms of the V sign are present, but one is narrower<br> <b>2C</b>            |                                                                                             |                                                                                             |                                                                                              | <b>CoAo</b>                                                                                   |                                                                                               |
| <b>Pattern 4</b> - only one vessel can be observed with a curved course<br> <b>2D</b>                | <b>TGA</b>                                                                                  | <b>Conotruncal malformation</b><br><br><b>DORV</b><br><br><b>TOF</b><br><br><b>CAT?</b>     |                                                                                              |                                                                                               |                                                                                               |
| <b>Pattern 5</b> - only one vessel can be observed with a straight course.<br> <b>2E</b>             |                                                                                             | <b>CAT</b>                                                                                  |                                                                                              |                                                                                               | <b>HLHS</b><br><br><b>univentricular heart</b>                                                |

\*Authors: Catalin G Herghelegiu, Anca Panaitescu, Alina Veduta. AVSD – atrioventricular septal defect; RAA – right aortic arch; CoAo – coarctation of the Aorta; TGA – transposition of great arteries; DORV – double outlet right ventricle; TOF – tetralogy of Fallot; CAT – common arterial trunk; HLHS – hypoplastic left heart syndrome
